# Supplementary material for: Flexible, Strong and Multifunctional Anf@Ag Nanocomposite Film for Human Physiology and Motion Monitoring
Source: MDPI journal article supplement (doi:10.3390/pr10050961), 2022-05-11
Supplement: s1 [file s1]

Article

# Flexible, Strong and Multifunctional Anf@Ag Nanocomposite Film for Human Physiology and Motion Monitoring

Haofan Long<sup>1,†</sup>, Qing Li<sup>1,†</sup>, Shulan Peng<sup>1</sup>, Shiqiang Chen<sup>1</sup>, Tonghua Zhang<sup>1</sup>, Mingyuan Zhang<sup>2</sup>, Minghua Li<sup>2</sup> and Lei Chen<sup>1,2,\*</sup>

<sup>1</sup> College of Sericulture, Textile and Biomass Sciences, Southwest University, Chongqing 400715, China; longhaofande163@163.com (H.L.); qingli@swu.edu.cn (Q.L.); pengshulan@luolai.com.cn (S.P.); csq123163@163.com (S.C.); zhtonghua@aliyun.com (T.Z.);

<sup>2</sup> State Key Laboratory of Bio-Fibers and Eco-Textiles, Qingdao University, Qingdao 266071, China; zhangyuanming001@163.com (M.Z.); hw7812@163.com (M.L.)

\* Correspondence: raychen@swu.edu.cn.

† These authors contributed equally to this work.

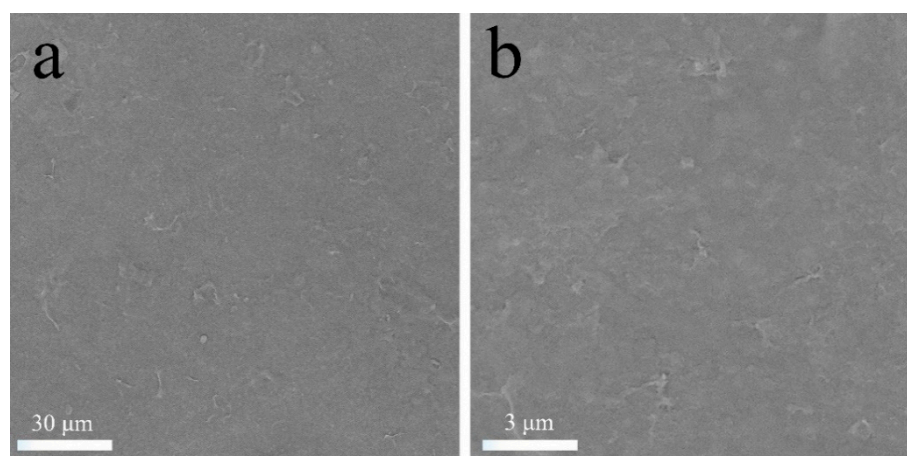

**Figure S1.** Surface morphologies of the ANF film prepared by ordinary drying process at (a) low and (b) high magnification.

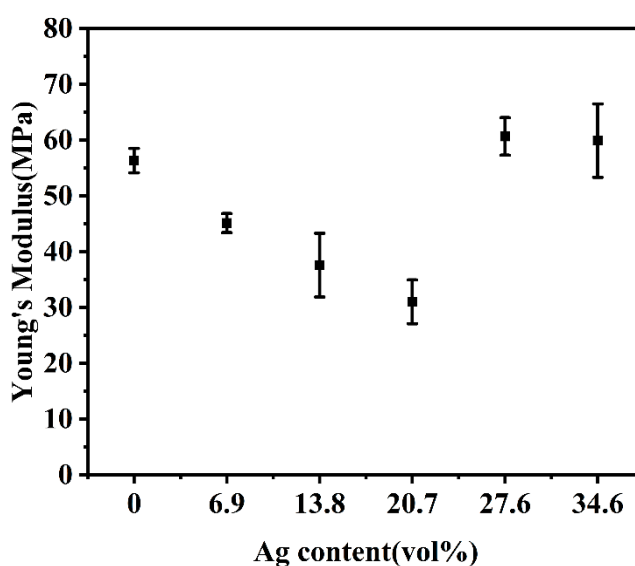

**Figure S2.** Young's modulus of the ANF film and ANF@Ag nanocomposite films with different Ag content.

**Citation:** Long, H.; Li, Q.; Peng, S.; Chen, S.; Zhang, T.; Zhang, M.; Li, M.; Chen, L. Flexible, Strong and Multifunctional Anf@Ag Nanocomposite Film for Human Physiology and Motion Monitoring. *Processes* **2022**, *10*, 961. <https://doi.org/10.3390/pr10050961>

Academic Editor: Enrico Marsili

Received: 02 April 2022

Accepted: 28 April 2022

Published: 11 May 2022

**Publisher's Note:** MDPI stays neutral with regard to jurisdictional claims in published maps and institutional affiliations.

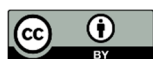

**Copyright:** © 2022 by the authors. Licensee MDPI, Basel, Switzerland. This article is an open access article distributed under the terms and conditions of the Creative Commons Attribution (CC BY) license (<https://creativecommons.org/licenses/by/4.0/>).

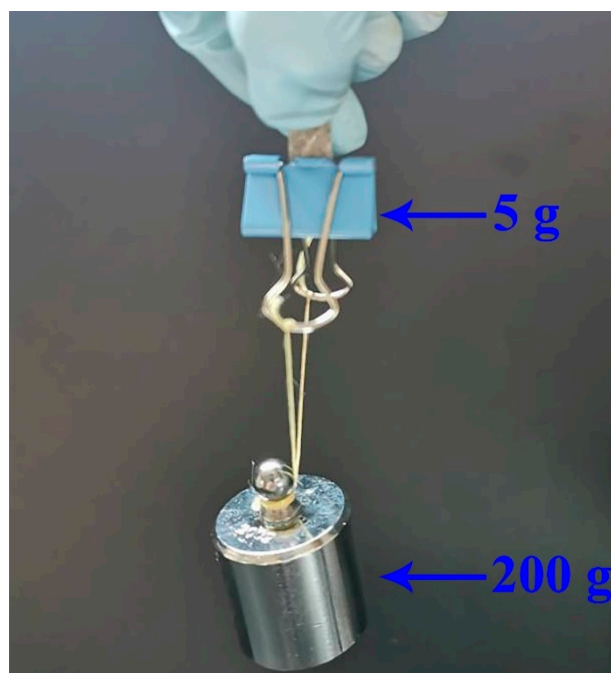

**Figure S3.** Digital photograph of demonstrating the ability of the ANF@Ag nanocomposite film (27.6 vol%) completely support ca. 205 g mass.

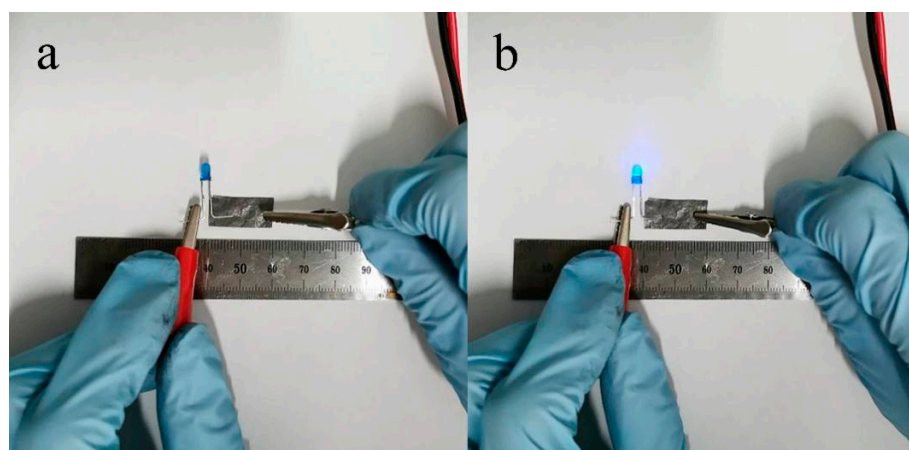

**Figure S4.** Digital Photographs of the ANF@Ag nanocomposite film (27.6 vol%) connected to a circuit with a LED bulb.

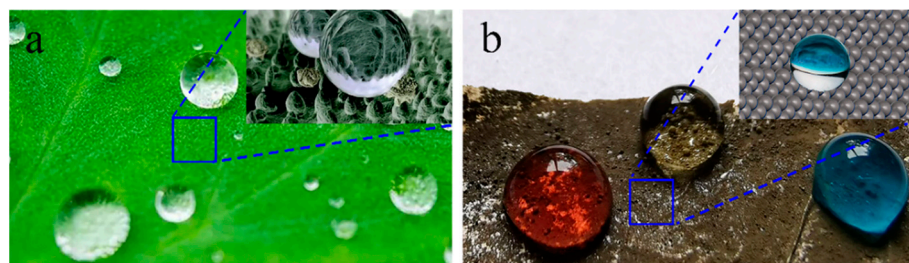

**Figure S5.** (a) Mastoid structure of lotus leaf and (b) Hierarchical structure of the ANF@Ag nanocomposite film.

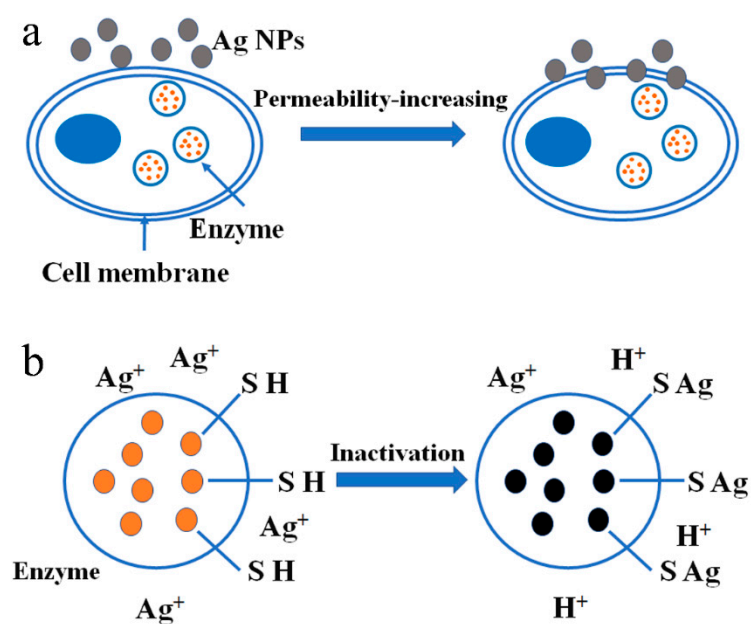

**Figure S6.** Schematic illustration of the antibacterial mechanism of the Ag NPs.

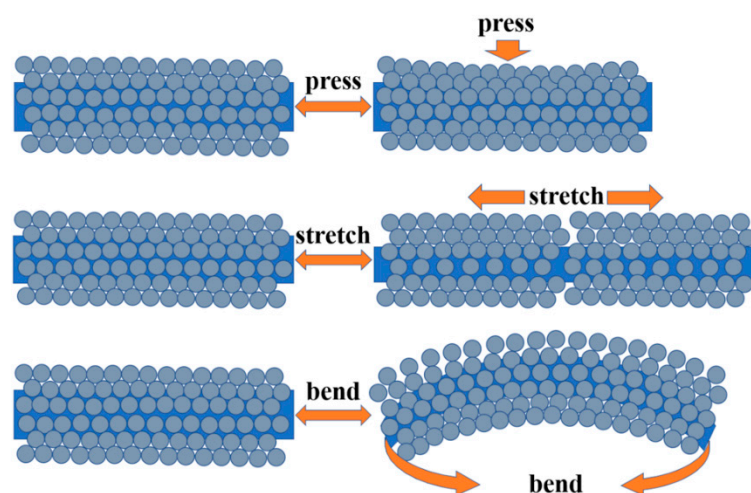

**Figure S7.** Schematic illustration of the ANF@Ag pressure sensor in response to different external mechanical stimuli.
